# Supplementary material for: Fine needle aspirates comprehensively sample intrahepatic immunity
Source: PubMed Central journal article supplement (PMC6691856; doi:10.1136/gutjnl-2018-317071), 2018-11-28

Figure S1

A) Patient: #21  
CD8 T cells

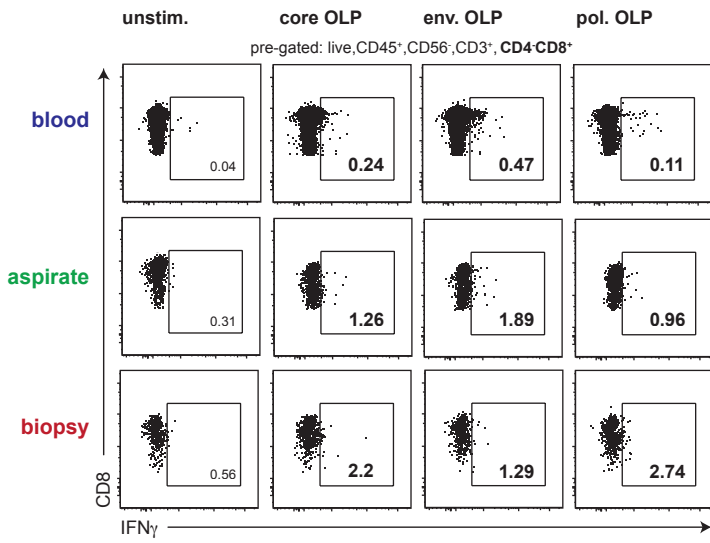

B) Patient: #26

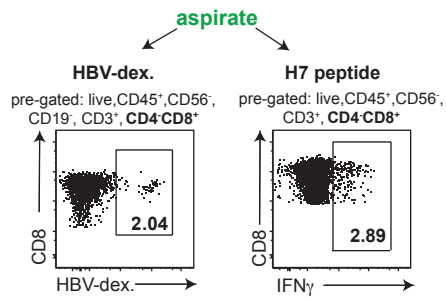

C) Patient: #26

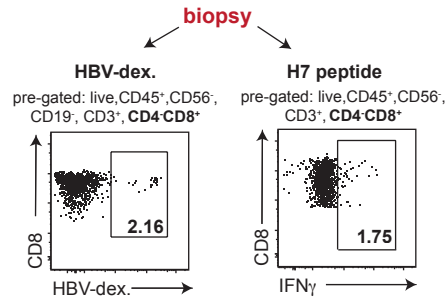

Supplement: gutjnl-2018-317071supp002.pdf [file gutjnl-2018-317071supp002.pdf]
